## Visualizing single-cell RNA-seq datasets with Similarity Weighted Nonnegative Embedding (SWNE)

Yan Wu<sup>1</sup>, Pablo Tamayo<sup>2,3</sup>, Kun Zhang<sup>1</sup>

<sup>1</sup>*Department of Bioengineering, University of California San Diego*

<sup>2</sup>*Moore's Cancer Center, University of California San Diego*

<sup>3</sup>*School of Medicine, University of California San Diego*

### Abstract

High throughput single-cell RNA-seq (scRNA-seq) has enabled the discovery of novel cell types, the identification of trajectories during development, and the characterization of responses to genetic perturbations. The most popular visualization method for scRNA-seq is t-Stochastic Neighbor embedding (t-SNE), which accurately captures the local structure of datasets, but often distorts global structure, such as distances between clusters. We developed a method for visualization and interpretation of scRNA-seq datasets, Similarity Weighted Nonnegative Embedding (SWNE), which captures both the global and local structure of the data, and enables relevant biological information to be embedded directly onto the visualization. SWNE uses nonnegative matrix factorization (NMF) to decompose the gene expression matrix into biologically relevant factors, embeds both the cells and the factors in a two dimensional visualization, and uses a similarity matrix to ensure that cells which are close in the original gene expression space are also close in the visualization. The embedded biological factors can be interpreted via their gene loadings, while SWNE can also embed genes onto the visualization directly, further enhancing biological interpretation. We demonstrate SWNE's ability to visualize and facilitate interpretation of hematopoietic progenitors and neuronal cells from the human visual cortex and cerebellum. The SWNE R package and the scripts used for this paper can be found at: <https://github.com/yanwu2014/swne>.

## Background

Single cell gene expression profiling has enabled the quantitative analysis of many different cell types and states, such as human brain cell types<sup>1,2</sup> and cancer cell states<sup>3,4</sup>, while also enabling the reconstruction of cell state trajectories during reprogramming and development<sup>5-7</sup>. Recent advances in droplet based single cell RNA-seq technology<sup>2,8,9</sup> as well as combinatorial indexing techniques<sup>10,11</sup> have improved throughput to the point where tens of thousands of single cells can be sequenced in a single experiment, creating an influx of large single cell gene expression datasets. Numerous computational methods have been developed for latent factor identification<sup>12</sup>, clustering<sup>13</sup>, and cell trajectory reconstruction<sup>6,7</sup>. However, one of the most common visualization methods is still t-Stochastic Neighbor Embedding (t-SNE), a non-linear visualization method that tries to minimize the Kullback-Leibler (KL) divergence between the probability distribution defined in the high dimensional space and the distribution in the low dimensional space<sup>14,15</sup>.

t-SNE very accurately captures local structures in the data, ensuring cells that are in the same cluster are close together<sup>15</sup>. This property enables t-SNE to find structures in the data that other methods, such as Principal Component Analysis (PCA)<sup>16</sup> and Multidimensional Scaling (MDS)<sup>17</sup>, cannot<sup>14</sup>. However, t-SNE often fails to accurately capture global structures in the data, such as distances between clusters, possibly due to asymmetry in the KL divergence metric and the necessity of fine-tuning the perplexity hyperparameter<sup>14</sup>. Additionally, t-SNE visualizations do not provide biological context, such as which genes are expressed in which clusters, requiring additional plots or tables to interpret the data. While some newer methods such as UMAP address the issue of capturing global structures in the data, no methods, to our knowledge, allow for biological information to be embedded onto the visualization<sup>18</sup>.

## Results

We developed a method for visualizing high dimensional single cell gene expression datasets, Similarity Weighted Nonnegative Embedding (SWNE), which captures both local and global properties of the data, while enabling genes and relevant biological factors to be embedded directly onto the visualization. SWNE uses the Onco-GPS framework<sup>19</sup> to decompose the gene expression matrix into latent factors, embeds both factors and cells in two dimensions, and improves the embedding by using a similarity matrix to ensure that cells which are close in the high dimensional space are also close in the visualization.

First, SWNE uses Nonnegative Matrix Factorization (NMF)<sup>20,21</sup> to create a parts based factor decomposition of the data (**Figure 1a**). The number of factors ( $k$ ) is chosen by randomly selecting 20% of the gene expression matrix to be set to missing, and then finding the factorization that best imputes those missing values, minimizing the mean squared error (**Figure 1a**). With NMF, the gene expression matrix ( $A$ ) is decomposed into: (1) a *genes by factors* matrix ( $W$ ), and (2) a *factors by cells* matrix ( $H$ ) (**Figure 1a**). SWNE then calculates the pairwise distances between the rows of the  $H$  matrix, and uses Sammon mapping<sup>22</sup> to project the distance matrix onto two dimensions (**Figure 1a**). SWNE embeds genes relative to the factors using the gene loadings in the  $W$  matrix, and embeds cells relative to the factors using the cell scores in the  $H$  matrix (**Figure 1a**). Finally, SWNE uses a similarity matrix to weight the cell coordinates so that cells which are close in the high dimensional space are close in the visualization (**Figure 1a**). In the following analyses, we specifically use a Shared Nearest Neighbors (SNN) matrix<sup>23</sup> although it is possible to use other types of similarity matrices.

To benchmark SWNE against PCA and t-SNE, we used the Splatter scRNA-seq simulation method<sup>24</sup> to generate a synthetic dataset with 6000 cells split into four clusters, where clusters 1 – 3 are close to each other and all far away from cluster 4 (**Methods**). Qualitatively, the PCA plot successfully captures the difference between cluster 4 and clusters 1 – 3, but is unable to cleanly separate clusters 1 – 3 (**Figure 1b**). On the other hand, the t-SNE

plot is able to cleanly separate all four clusters, but makes it look like all four clusters are roughly equidistant, whereas in reality cluster 4 should be farther apart from clusters 1 – 3 (**Figure 1c**). The SWNE plot is able to separate all four clusters, and also accurately places cluster 4 further from clusters 1 – 3, while also allowing biologically relevant genes and factors to be embedded directly onto the plot (**Figure 1d**).

We then applied SWNE to analyze the single cell gene expression profiles of hematopoietic cells at various stages of differentiation from Paul, et al<sup>25</sup> (**Figure 2a**). Briefly, single cells were sorted from bone marrow and their mRNA was sequenced with scRNA-seq<sup>25</sup> (**Figure 2a**). The differentiation trajectories of these cells were reconstructed using Monocle2<sup>6</sup>, a method built to identify branching trajectories and order cells according to their differentiation status, or “pseudotime” (**Figure 2a**). The branched differentiation trajectories are shown in the tree in **Figure 2a**, starting from the monocyte and erythrocyte progenitors (MP/EP) and either moving to the erythrocyte (Ery) branch on the left, or the various monocyte cell types on the right<sup>6</sup>. To select the number of factors to use for NMF, we randomly selected 25% of the gene expression matrix to set as missing, and then iteratively run NMF across a range of  $k$  to impute the missing values (**Figure S1a, Methods**). We then take the values of  $k$  which are at or near the minimum mean squared error, and then choose the  $k$  that qualitatively produces the best visualization (**Figure S1a, Figure S1b, Methods**).

Qualitatively, the SWNE plot (**Figure 2b**) separates the different cell types at least as well as the t-SNE plot (**Figure 2c**). However, the SWNE plot does a much better job of capturing the two dominant branches: the erythrocyte differentiation branch and the monocyte differentiation branch, and shows that those two branches are the primary axes of variation in this dataset (**Figure 2b**). While the t-SNE plot captures the correct orientation of the cell types, it is not clear that there are two main branches in the data and that the main variation in this dataset is along these two branches (**Figure 2c**). We also used Monocle2 to calculate differentiation pseudotime for the dataset, which is a metric that orders cells by how far along

the differentiation trajectory they are<sup>6</sup>. We then overlaid the pseudotime score on the SWNE and t-SNE plots (**Figure 2d**, **Figure 2e**). Again, we can see that the SWNE plot captures the branching structure and there's a clear gradient of cells at different stages of differentiation along the two main branches (**Figure 2d**). The gradient in the t-SNE plot is not as visible because the t-SNE plot seems to be capturing the variance in the highly differentiated cells, which we can see from the large amount of dark red in the t-SNE plot (**Figure 2e**).

SWNE provides an intuitive framework to visualize how specific genes and biological factors contribute to the visual separation of cell types or cell trajectories by embedding factors and genes onto the visualization. We used the gene loadings matrix ( $W$ ) to identify the top genes associated with each factor, as well as the top marker genes for each cell type, defined using Seurat<sup>26</sup> (**Methods**). We chose three factors and five genes that we found biologically relevant (**Figure S2a**, **Figure S2b**, **Figure S2c**). The five genes are: *ApoE*, *Flt3*, *Mt2*, *Sun2*, and *Pglyrp*. The three factors are: Antigen Presentation, Metal Binding, and Platelet Generation, and factor names were determined from the top genes and associated with each factor (**Figure S2a**) (**Table S1**). The factors and genes enable a viewer to associate biological processes and genes with the cell types and latent structure shown in the data visualization. For example, dendritic cells (DC) are associated with Antigen Presentation, while erythrocytes (Ery) are associated with Heme metabolism and express *Mt2*, a key metal binding protein (**Figure 2b**). Additionally, the embedded factors and genes allow for interpretation of the overall differentiation process (**Figure 2d**). Undifferentiated progenitors (MP/EP) express *ApoE*, while more differentiated monocytes express *Sun2* and *Pglyrp1* (**Figure 2d**, **Figure S3a**).

We also applied SWNE to a single nucleus RNA-seq human brain dataset<sup>2</sup> from the visual cortex (13,232 cells) and the cerebellum (9,921 cells) (**Figure 3a**). Briefly, single nuclei were dissociated from the visual cortex and cerebellum of a single donor and sequenced using single nucleus Drop-seq<sup>2</sup>. We also applied SWNE to the subset of layer specific excitatory neurons in the visual cortex, where each layer has different functions<sup>27-29</sup> (**Figure 3a, inset**). For

the SWNE plot, we selected the number of factors using the same missing value imputation method as for the hematopoiesis dataset (**Figure S1c, Figure S1d**). We can see that both the SWNE plot (**Figure 3b**) and the t-SNE plot (**Figure 3d**) are able to visually separate the various brain cell types. However, the SWNE plot is able to ensure that related cell types are close in the visualization, specifically that the inhibitory neuron subtypes (In1 – 8) are together in the top of the plot (**Figure 3b**). In the t-SNE plot the inhibitory neuron subtypes are separated by the Astrocytes (Ast) and the Oligodendrocytes (Oli) (**Figure 3d**).

As with the hematopoiesis dataset, SWNE facilitates interpretation of the data via gene and biological factor embedding. We selected three factors (Myelin, Cell Junctions, and Immune Response) and 8 genes (*PLP1*, *GRIK1*, *SLC1A2*, *LHFPL3*, *CBLN2*, *NRGN*, *GRM1*, *FSTL5*) to project onto the SWNE plot using the cell type markers and gene loadings (**Figure S2d, Figure S2e, Figure S2f, Table S1**), adding biological context to the spatial placement of the cell types (**Figure 3b**). We can see that *CBLN2*, a gene known to be expressed in excitatory neuron types<sup>30</sup>, is expressed in the visual cortex excitatory neurons and that *GRIK1*, a key glutamate receptor<sup>31</sup>, is expressed in inhibitory neurons (**Figure 3b, Figure S3b**). Additionally, the Myelin biological factor is associated with Oligodendrocytes (Oli), consistent with their function in creating the myelin sheath<sup>32</sup> (**Figure 3b**). The Cell junction biological factor is very close to Endothelial cells (End), reinforcing their functions as the linings of blood vessels (**Figure 3b**).

Finally, SWNE has a unique advantage over t-SNE in capturing the local and global structure of the data, allowing for visualization of both the physical structure and function of the layer specific excitatory neurons (**Figure 3c, 3e**). The SWNE plot visually separates the different neuronal layers, while also showing that the main axis of variance is along the six cortical layers of the human brain (**Figure 3c**). We can clearly trace a trajectory from the most superficial neuron layers (L2/3) to the deepest neuron layers (L6/6b) (**Figure 3c**). The t-SNE plot can visually separate the layers, but the layer structure is not apparent (**Figure 3e**). With the t-SNE plot, it is unclear that the main axis of variance is between the different layers (**Figure 3e**).

Additionally, we selected five layer specific marker genes (*DAB1*, *NTNG1*, *DCC*, *HS3ST2*, *POSTM*) to project onto the SWNE plot (**Figure S2g, Figure 3c**). *DAB1*, a signal transducer for Reelin<sup>33</sup>, is primarily expressed in Layer 2/3 excitatory neurons, while *NTNG1*, a protein involved in axon guidance<sup>34</sup>, is expressed in Layer 4 neurons (**Figure 3c, Figure S3c**).

## Discussion

One important SWNE parameter is the number of factors ( $k$ ) used for the decomposition (Figure 1a). We used a model selection method, suggested by the author of the NNLM<sup>35</sup> package, which uses NMF to impute missing values in the gene expression matrix ( $A$ ) and tries to select the  $k$  that minimizes the imputation error (**Figure S1, Methods**). However, oftentimes there is a range of  $k$  that is very close to the global minimum error, such as in **Figure S1a** where  $k$  could be anywhere from 12 to 16. We have found that the global minimum will also sometimes vary depending on the fraction of values set missing in  $A$ , and also the specific sampling of matrix elements. Additionally, there are oftentimes multiple local minima. Because of this variability, we only use our model selection method to narrow down the range of possible  $k$  values, and then construct visualizations across this narrower range of  $k$  to pick the qualitatively best visualization (**Methods**). One area of future work could be to develop an unbiased model selection method explicitly for creating the optimal visualization.

Selecting which genes and factors to embed onto the SWNE plot is an important process. Ideally one wants to select the best marker genes for cell types of interest, or the genes with the highest magnitude loadings for biologically relevant factors. Since embedding a gene as a single data point on the plot does not convey the same amount of information as overlaying the gene expression, we created feature plots for key genes in the hematopoiesis, cortex & cerebellum, and layer specific excitatory neuron datasets to demonstrate that cells which are spatially close to an embedded gene actually express more of that gene (**Figure S4a,**

**S4b, S4c**). For example, we can see in **Figure S4b** that the excitatory neurons close to the embedded CBLN2 point express more CBLN2. In cases where the gene selected is not a good cell type marker, then the gene's embedded coordinates should be near the center of the plot, equidistant to one or more groups of cells.

One additional highlight of SWNE is that the underlying methodology is fairly simple, especially compared to methods such as UMAP and t-SNE<sup>14,18</sup>. The Onco-GPS based embedding, and subsequent similarity matrix weighting is very transparent, allowing users to understand how the visualization is being produced. For many users, methods such as UMAP and t-SNE can be a black box that they use to generate visualizations.

The simplicity of SWNE also makes it possible to project additional data onto an existing SWNE plot, something that is difficult to do with non-linear methods like t-SNE and UMAP (**Methods, Figure S5a, Figure S5b**). To demonstrate data projection, we used a 3,000 PBMC dataset generated by 10X genomics<sup>36</sup>, and split the data into training and test datasets. We ran the standard SWNE embedding on the training dataset, and then projected the test dataset onto the training SWNE embedding (**Figure S5a, Figure S5b**). We can see that the various clusters occupy the same general coordinates in the SWNE plot from training to test, except for the Megakaryocyte cells (**Figure S5a, Figure S5b**). We believe that this is because there are only 15 Megakaryocyte cells total, which makes their embedding somewhat unstable.

## Conclusion

Overall, we developed a visualization method, SWNE, which captures both the local and global structure of the data, and enables relevant biological factors and genes to be embedded directly onto the visualization. Capturing global structure enables SWNE to successfully capture differentiation trajectories, and layer specific neuron structure that is not apparent in other visualizations such as t-SNE. Being able to embed key marker genes and relevant biological factors adds important biological context to the SWNE plot, facilitating interpretation. Finally, the



simplicity of SWNE allows users to intuitively understand the embedding process, as well as project new data on existing SWNE visualizations. We applied SWNE to a hematopoiesis dataset, where it was able to capture the branched differentiation trajectory. We also applied SWNE to cells from the visual cortex and cerebellum, where it was able to visually separate different cell types while ensuring close cell types, such as different inhibitory neuron subtypes, are close together. Additionally, SWNE was able to capture the layer specific structure of excitatory neurons, demonstrating that SWNE can visualize both biological structure and function.

Future work could include examining how external methods for generating similarity matrices and for factor decomposition work within the SWNE framework. For example, one could use SIMLR<sup>13</sup> to create the similarity matrix instead of using an SNN matrix. There are also a variety of methods for decomposing gene expression matrices into latent factors, including f-scLVM and pagoda/pagoda2<sup>12,37</sup>. Both these methods can use pre-annotated gene sets to guide the factor decomposition, which would allow the embedded factors to be even more easily interpreted.

## **Acknowledgements**

We would like to acknowledge Dr. Prashant Mali for their feedback and advice, and Dinh Diep for their technical feedback. Additionally, we would like to acknowledge the Zhang Lab, the Tamayo Lab, and the Mali Lab for their help and support.

Funded in part by NIH grants R01HG009285 (KZ & PT), U01CA217885 (PT), and P30 CA023100 (PT), U01MH098977 (YW & KZ), R01HL123755 (YW & KZ)

## **Code and Data**

The SWNE package is available at <https://github.com/yanwu2014/swne>. The scripts used for this manuscript are under the Scripts directory. The raw data for the hematopoietic cells can be

found at the GEO accession GSE72857, while the raw data for the neural cells can be found at the GEO accession GSE97930. The PBMC dataset can be found at the 10X genomics website: <https://support.10xgenomics.com/single-cell-gene-expression/datasets/1.1.0/pbmc3k>.

## Conflicts of Interest

The authors declare no conflicts of interest.

## Methods

### *Normalization, variance adjustment, and scaling*

We normalize the data matrix by dividing each column (sample) by the column sum and multiplying by a scaling factor. Batch effects were normalized by a simple model, adapted from pagoda2<sup>37,38</sup>, that subtracts any batch specific expression from each gene. We used the variance adjustment method from pagoda<sup>37</sup> to adjust the variance of features, an important step when dealing with RNA-seq data. Briefly, a mean-variance relationship for each feature is fit using a generalized additive model (GAM) and each feature is multiplied by a variance scaling factor calculated from the GAM fit. Feature scaling is also performed using either a log-transform, or the Freeman-Tukey transform.

### *Nonnegative Matrix Factorization and model selection*

We use the NNLM package<sup>35</sup> to run the Nonnegative Matrix Factorization (NMF). **Equation 1** shows the NMF decomposition:

$$A = WH \quad (1)$$

Where  $A$  is the (features x samples) data matrix,  $W$  is the (features x factors) feature loading matrix, and  $H$  is the (factors x samples) low dimensional representation of the data. We select

the number of factors by setting a random subset of the data as missing, usually around 25% of the matrix, and then use the NMF reconstruction ( $W \times H$ ) to impute the missing values across a range of factors. The number of factors,  $k$ , which minimizes the mean squared error, is typically the optimal number of factors to use. In some cases, there are multiple local minima, or there are multiple values of  $k$  that are very close to the global minimum, so we create SWNE visualizations for a subset of those values of  $k$  and pick the  $k$  which results in the qualitatively best visualization.

### *Onco-GPS embedding*

We then use the embedding method from Onco-GPS<sup>19</sup> to embed those components onto a two dimensional visualization. Briefly, Onco-GPS embedding calculates the pairwise similarities between the factors (rows of the  $H$  matrix) using either Pearson correlation, or mutual information<sup>39</sup>. The similarity is converted into a distance with **equation 2**:

$$D = \sqrt{2(1 - R)} \quad (2)$$

Here,  $R$  is the pairwise similarity. We use Sammon mapping<sup>22</sup> to project the distance matrix into two dimensions, which represent the x and y coordinates for each factor. The factor coordinates are rescaled to be within the range zero to one. Let  $F_{ix}, F_{iy}$  represent the x and y coordinates for factor  $i$ . To embed the samples, we use **equations 3 & 4**:

$$L_{jx} = \frac{\sum_i (H_{ij} F_{ix})^\alpha}{\sum_i H_{ij}^\alpha} \quad (3)$$

$$L_{jy} = \frac{\sum_i (H_{ij} F_{iy})^\alpha}{\sum_i H_{ij}^\alpha} \quad (4)$$

$j$  is the sample index and  $i$  is iterating over the number of factors in the decomposition (number of rows in the  $H$  matrix). The exponent  $\alpha$  can be used to increase the “pull” of the NMF components to improve separation between sample clusters, at the cost of distorting the data.

Additionally, we can choose to sum over a subset of the top factors by magnitude for a given sample, which can sometimes help reduce noise.

### *Embedding features*

In addition to embedding factors directly on the SWNE visualization, we can also use the gene loadings matrix ( $W$ ) to embed genes onto the visualization. We simply use the  $W$  matrix to embed a gene relative to each factor, using the same method we used to embed the cells in the  $H$  matrix. If a gene has a very high loading for a factor, then it will be very close to that factor in the plot, and far from factors for which the gene has zero loadings. We do not use any sort of similarity matrix to bring the genes together, like we did with the cells.

### *Similarity weighting*

In order to ensure that samples which are close to each other in the high dimensional space are close in the 2d embedding, we use a similarity matrix. Specifically, we use a Shared Nearest-Neighbors (SNN) matrix. The SNN matrix is calculated using the Seurat package<sup>26</sup>. Briefly, Seurat calculates the approximate k-nearest neighbors for each sample using the Euclidean distance metric (either in the original gene expression space, or in the Principal Component space). For each sample, Seurat then calculates the fraction of shared nearest neighbors between that sample and the top 10\*k closest samples. We can then raise the SNN matrix, denoted here as  $S$ , to the exponent  $\beta$ :  $S = S^\beta$ . If  $\beta > 1$ , then the effects of neighbors on the cell embedding coordinates will be decreased, and if  $\beta < 1$ , then the effects will be increased. We then normalize the SNN matrix so that each row sums up to one. Let  $S$  represent the cell to cell similarity matrix, then the sample coordinates  $L_x$  and  $L_y$  are re-calculated using **equations 5 & 6**:

$$L'_x = SL_x \quad (5)$$

$$L'_y = SL_y \quad (6)$$

While we have found that an SNN matrix works well in improving the local accuracy of the embedding, other similarity matrices, such as those generated by scRNA-seq specific methods like SIMLR, could also work. In general, you should use whichever similarity or distance matrix you used for clustering.

The SNN matrix can be constructed from either the original gene expression matrix ( $A$ ), or on some type of dimensional reduction. We have found that constructing the SNN matrix from a PCA reduction tends to work well, especially in datasets where that follow a trajectory or trajectories (**Figure S4a**). Constructing the SNN matrix from the gene expression matrix is somewhat similar to using PCA; although the separation between cell types is not as clear (**Figure S4b**). However, using the NMF factors to build the SNN matrix oftentimes does not capture the primary axis or axes of variance, especially in cases where there is some type of smooth trajectory (**Figure S4c**). We believe this is due to PCA's ability to capture the axes of maximum variance, while NMF looks for a parts-based representation<sup>16,20</sup>. For datasets where there are discrete cell types, constructing the SNN matrix from the NMF factors is often similar to constructing the SNN matrix from PCA components. Thus, we default to building the SNN matrix from principal components.

### *Interpreting NMF components*

In order to interpret the low dimensional factors, we look at the gene loadings matrix ( $W$ ). We can find the top genes associated with each factor, in a manner similar to finding marker genes for cell clusters. Since we oftentimes only run the NMF decomposition on a subset of the overdispersed features, we can use a nonnegative linear model to project the all the genes onto the low dimensional factor matrix. We can also run Geneset Enrichment Analysis<sup>40</sup> on the gene loadings for each factor to find the top genesets associated with that factor.

### *Projecting New Data*

To project new data onto an existing SWNE embedding, we first have to project the new gene expression matrix onto an existing NMF decomposition, which we can do using a simple nonnegative linear model. The new decomposition looks like **equation 7**:

$$A' = WH' \quad (7)$$

Here,  $A'$  is the new gene expression matrix, and  $W$  is the original gene loadings matrix, which are both known. Thus, we can simply solve for  $H'$ . The next step is to project the new samples onto the existing SNN matrix. We project the new samples onto the existing principal components, and then for each test sample, we calculate the  $k$  closest training samples. Since we already have the kNN graph for the training samples, we can calculate, for each test sample, the fraction of Shared Nearest Neighbors between the test sample and every training sample. With the test factor matrix  $H'$ , and the test SNN matrix, we can run the SWNE embedding as previously described to project the new samples onto the existing SWNE visualization.

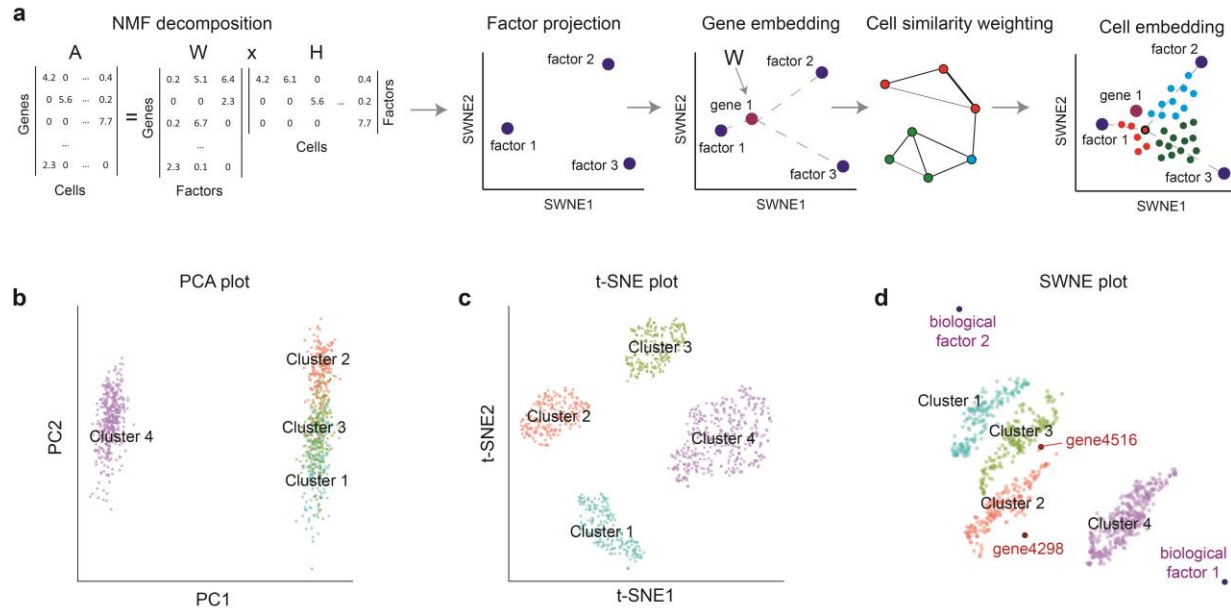

**Figure 1: (a)** Schematic overview of SWNE. The gene expression matrix (A) is decomposed into a gene loadings matrix (W) and a factor matrix (H) using Nonnegative Matrix Factorization (NMF), with the number of factors selected via minimizing imputation error. The factors are projected onto 2D via Sammon mapping by calculating pairwise distances between the factors (rows of H). Selected genes can be embedded relative to the factors using the gene loadings (W) matrix. Finally, the cells are embedded relative to the factors using the cell scores in the H matrix and the cell coordinates are then refined using a similarity matrix. **(b)** PCA plot of simulated scRNA-seq data generated using Splatter with four distinct clusters, where cluster 4 is further from clusters 1 – 3. **(c)** t-SNE plot of the simulated scRNA-seq data. **(d)** SWNE plot of the simulated scRNA-seq data, with simulated factors and genes projected onto the plot.

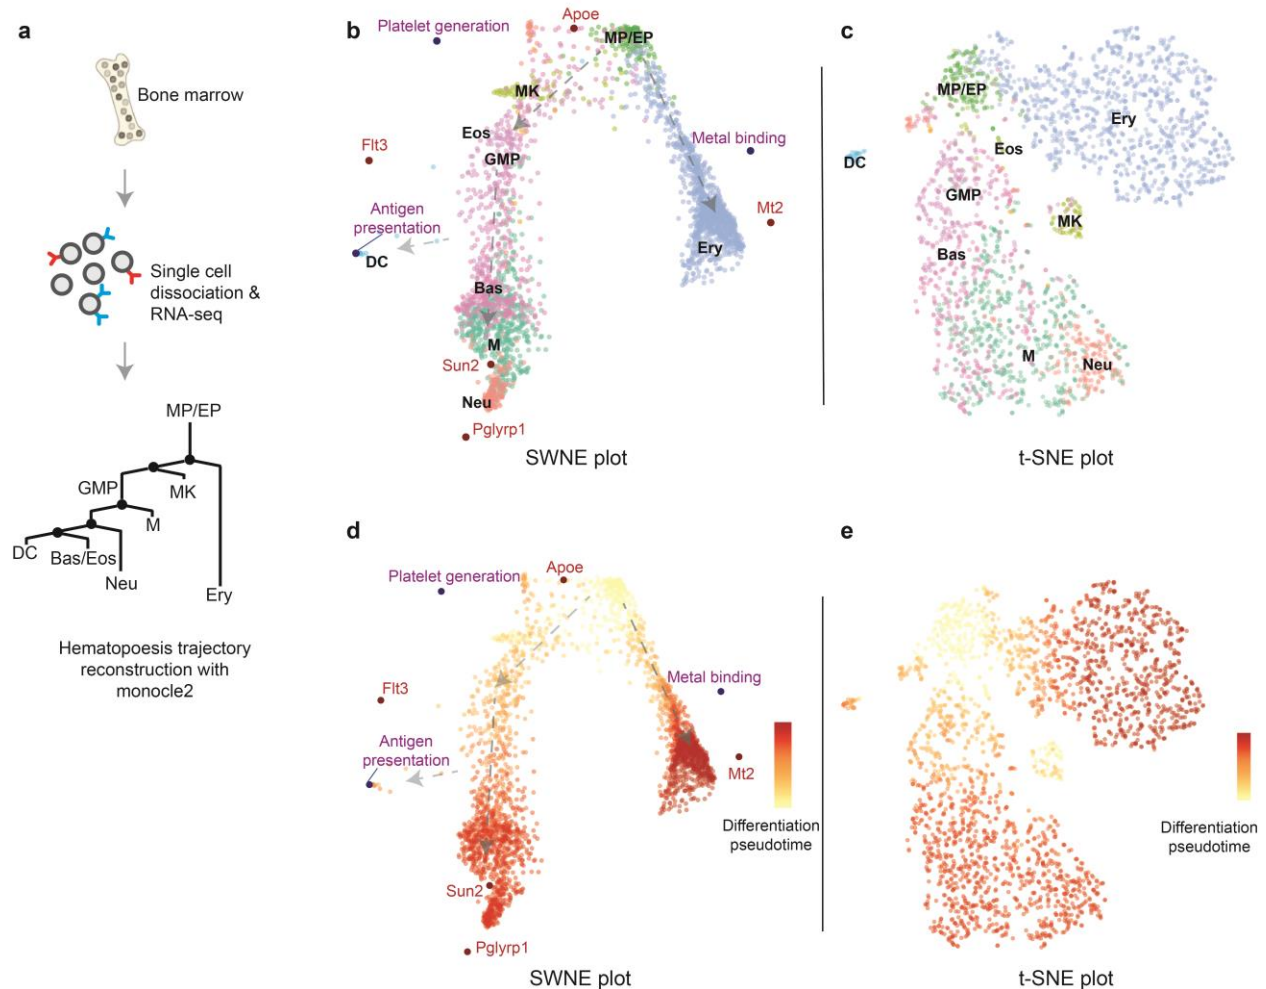

**Figure 2:** (a) Paul et al sorted single hematopoietic cells from bone marrow, sequenced them using scRNA-seq, and identified the relevant cell types. The hematopoiesis trajectories were reconstructed using Monocle2, and the cells were ordered according to their differentiation pseudotime. (b) SWNE plot of hematopoiesis dataset, with selected genes and biological factors displayed. (c) t-SNE plot of hematopoiesis dataset. (d) SWNE plot of hematopoiesis dataset, with developmental pseudotime calculated from Monocle2 overlaid onto the plot. (e) t-SNE plot of hematopoiesis dataset, with developmental pseudotime overlaid onto the plot.



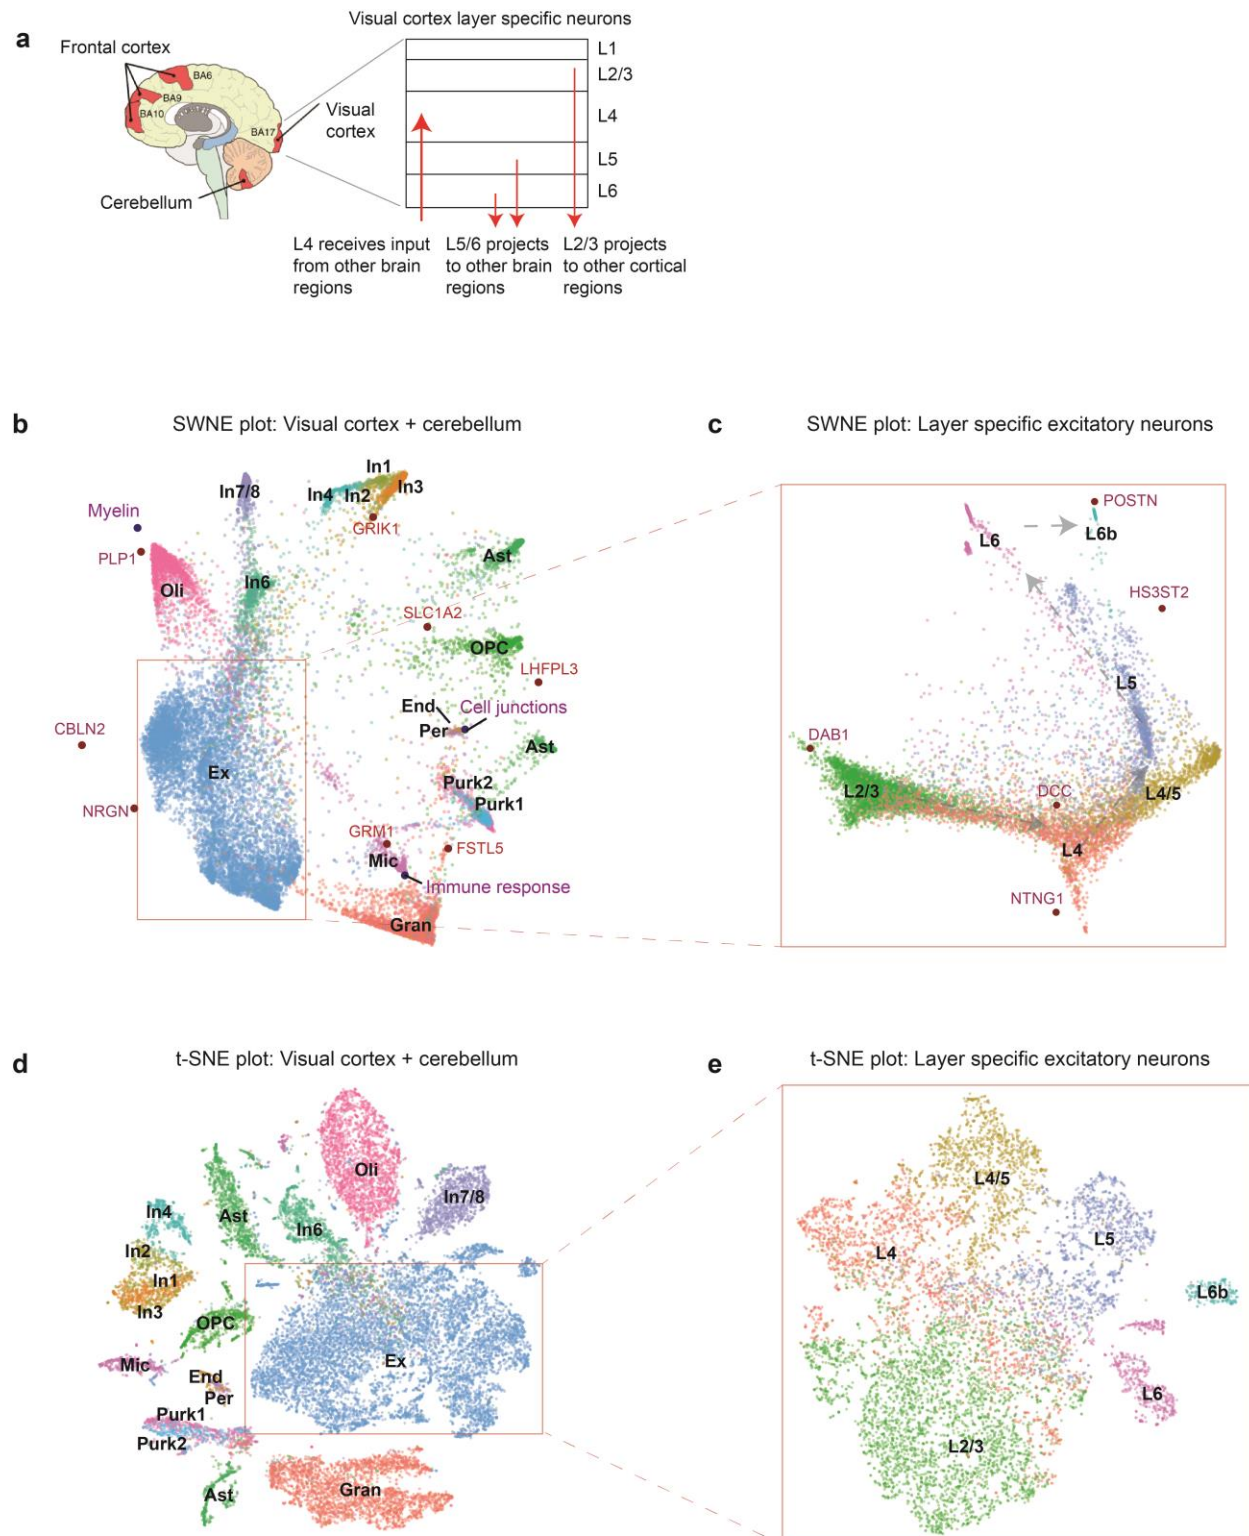

**Figure 3: (a)** Single nuclei were dissociated from the visual cortex and the cerebellum, and sequenced using single nucleus RNA-seq. The inset shows that the excitatory neurons from the

visual cortex are grouped into different spatial layers, each of which has different functions. **(b)**

SWNE plot of single cells from the visual cortex and cerebellum, with selected genes and

factors displayed. **(c)** Inset: SWNE plot of the excitatory neurons from the visual cortex only,

colored by the spatial layer the excitatory neurons belong to. **(d)** t-SNE plot of single cells from

the visual cortex and cerebellum. **(e)** t-SNE plot of the excitatory neurons from the visual cortex

only, colored by the spatial layer the excitatory neurons belong to.

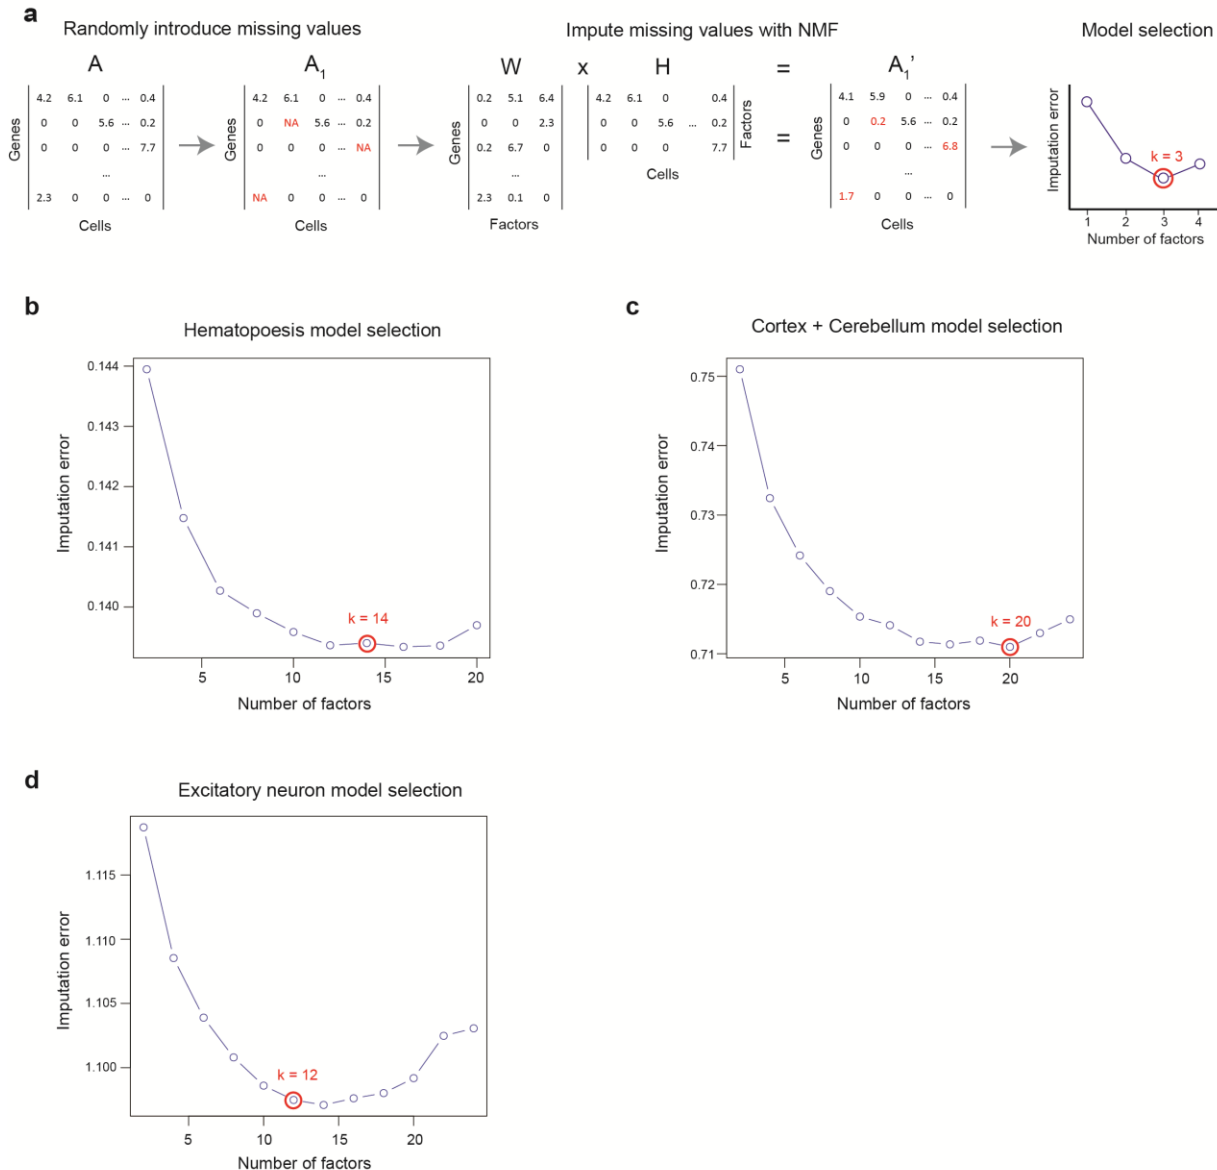

**Figure S1: (a)** A subset of the gene expression matrix is set to missing, and NMF is run across a range of factors, and the missing values are imputed. We then plot the imputation error vs number of factors ( $k$ ), and select the  $k$  values close to the minimum imputation error to create SWNE visualizations with. The  $k$  that gives the best visualization is selected. **(b)** Imputation error versus number of NMF factors for the hematopoiesis dataset **(c)** Imputation error versus number of NMF factors for the cortex & cerebellum dataset. **(d)** Imputation error versus number of NMF factors for the layer specific excitatory neurons.

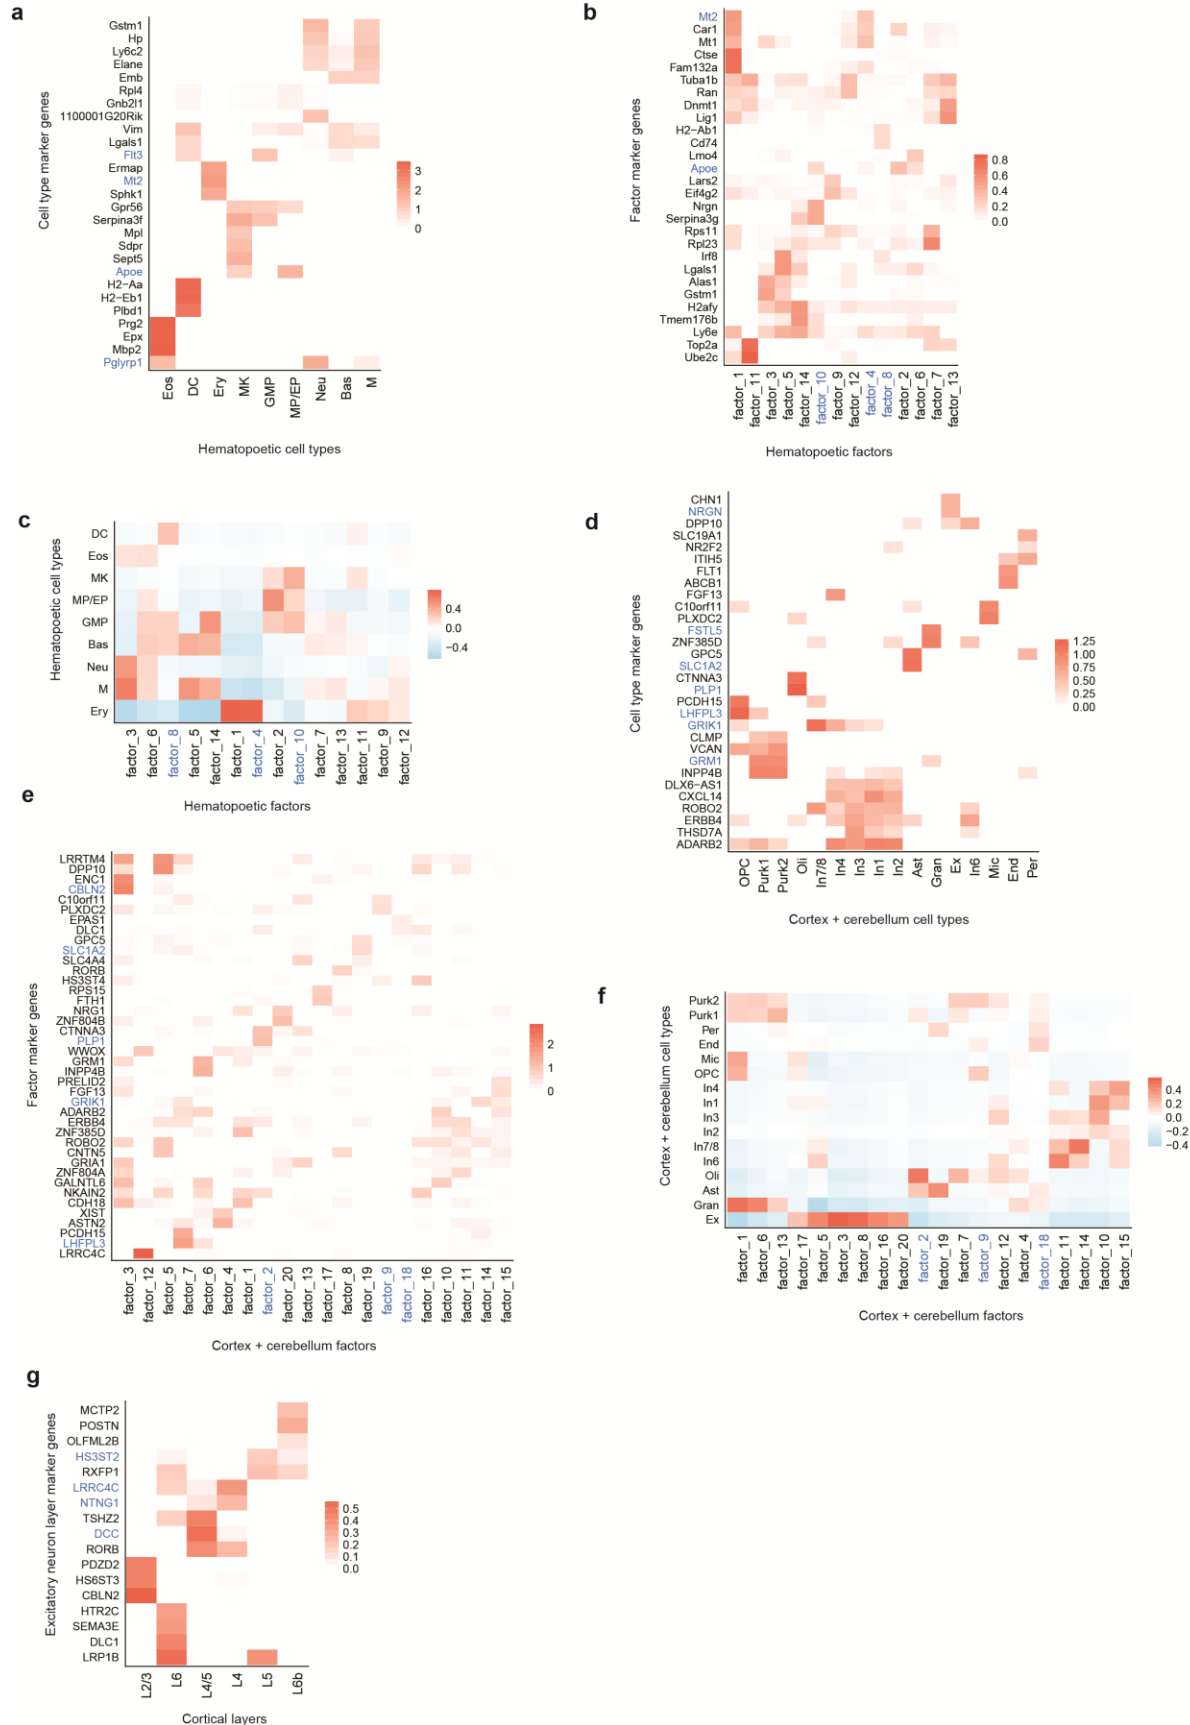

**Figure S2:** Genes and factors highlighted in blue are embedded in the corresponding visualization. **(a)** Log fold-change heatmap for the top cell type specific markers in the hematopoiesis dataset (**Figure 2b, Figure 2d**). **(b)** Top gene loadings heatmap for NMF factors in the hematopoiesis dataset (**Figure 2b, Figure 2d**). **(c)** Mutual information heatmap between the cell types and NMF factors in the hematopoiesis dataset (**Figure 2b, Figure 2d**). **(d)** Log fold-change heatmap for the top cell type specific markers in the cortex & cerebellum dataset (**Figure 3b**). **(e)** Top gene loadings heatmap for NMF factors in the cortex & cerebellum dataset (**Figure 3b**). **(f)** Mutual information heatmap between the cell types and NMF factors in the cortex & cerebellum dataset (**Figure 3b**). **(g)** Log fold-change heatmap for the top layer specific marker genes in the visual cortex excitatory neuron layers (**Figure 3c**).

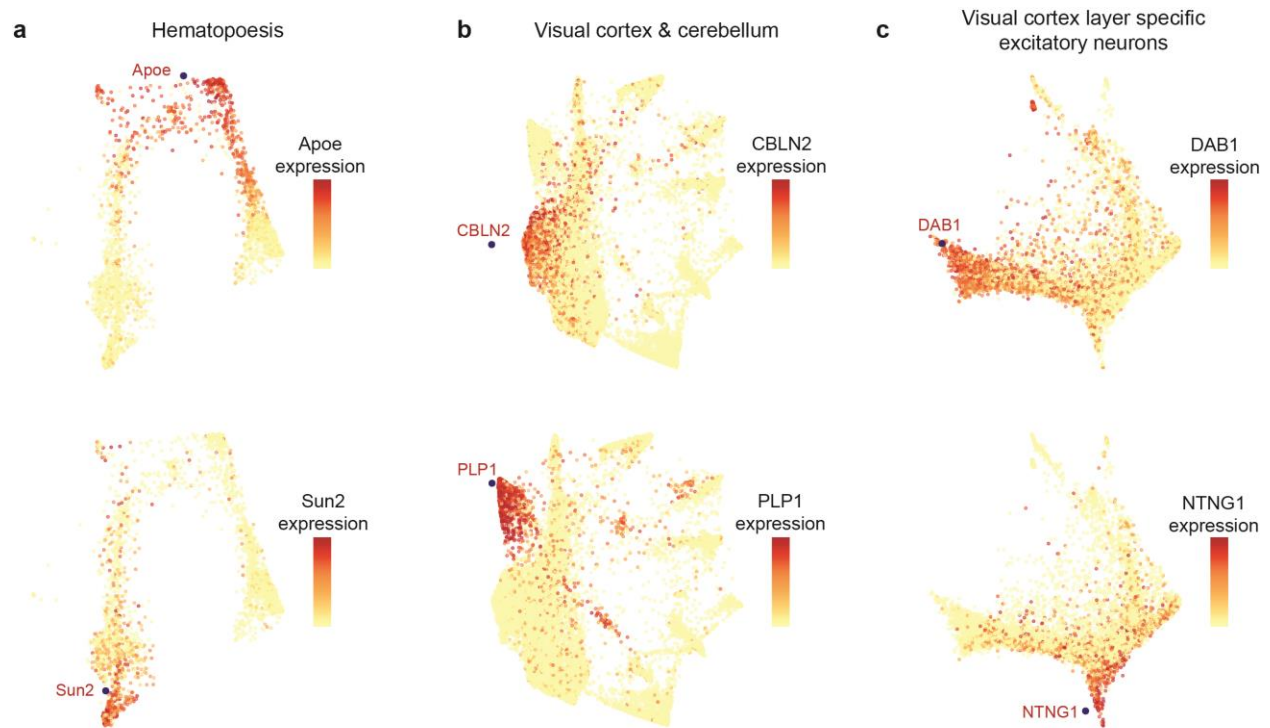

**Figure S3:** (a) Apoe projected onto the hematopoiesis SWNE plot with Apoe expression overlaid, validating the location of the Apoe projection. Sun2 projected onto the hematopoiesis SWNE plot with Sun2 expression overlaid. (b) CBLN2 projected onto the cortex & cerebellum SWNE plot with CBLN2 expression overlaid. PLP1 projected onto the cortex & cerebellum SWNE plot with PLP1 expression overlaid. (c) DAB1 projected onto the layer specific excitatory neuron SWNE plot with DAB1 expression overlaid. NTNG1 projected onto the layer specific excitatory neuron SWNE plot with NTNG1 expression overlaid.

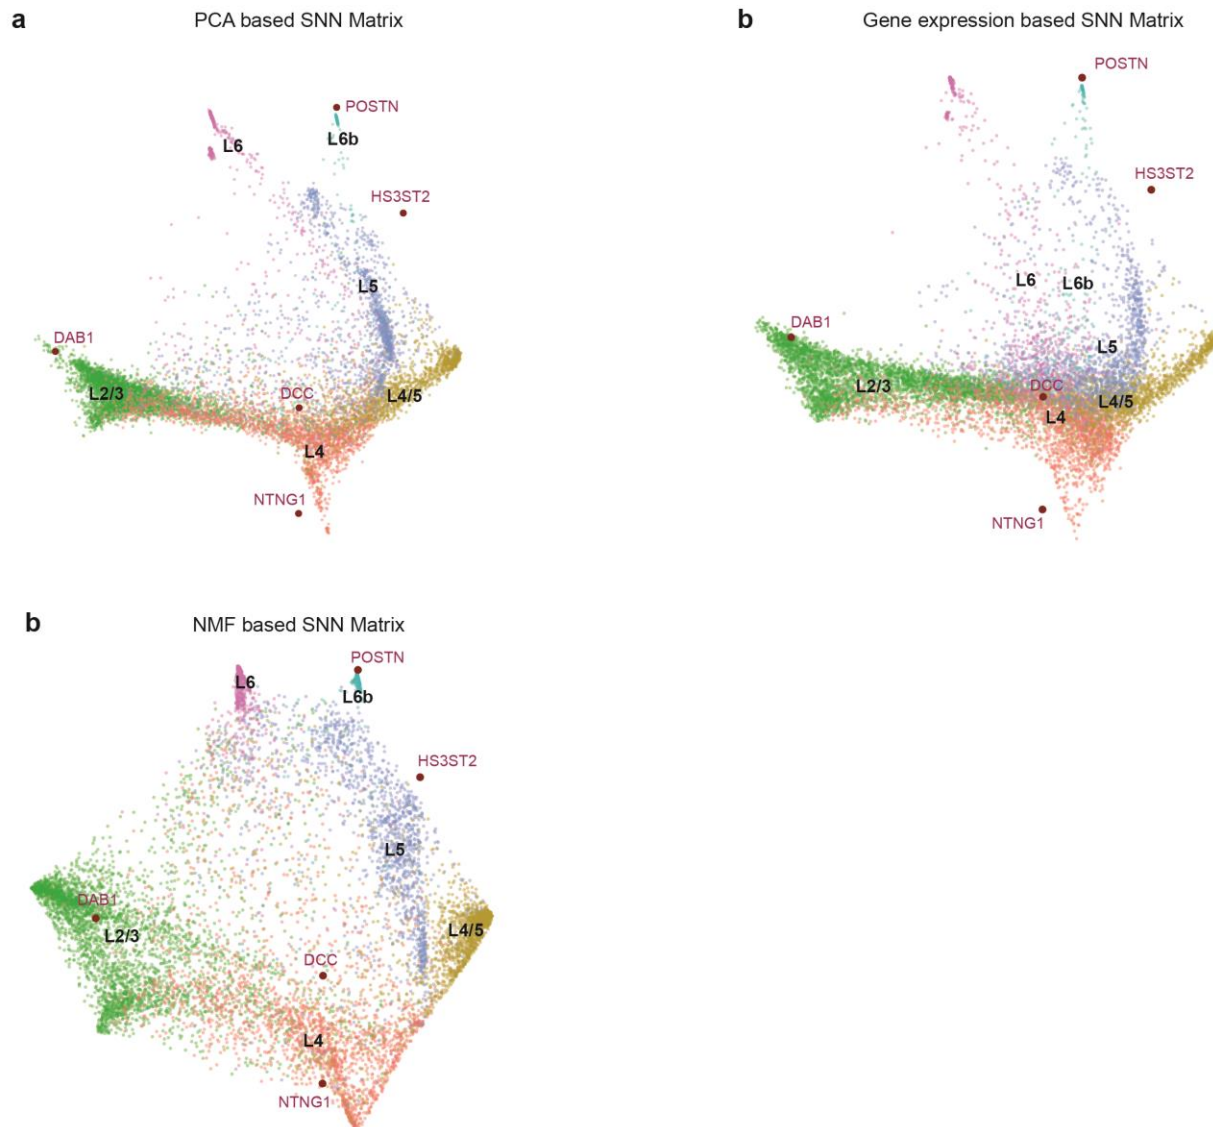

**Figure S4:** (a) SWNE plot of layer specific excitatory neurons with the SNN matrix constructed from PCA components (same as **Figure 3c**). (b) SWNE plot of layer specific excitatory neurons with the SNN matrix constructed from the gene expression matrix. (c) SWNE plot of layer specific excitatory neurons with the SNN matrix constructed from the NMF factors.



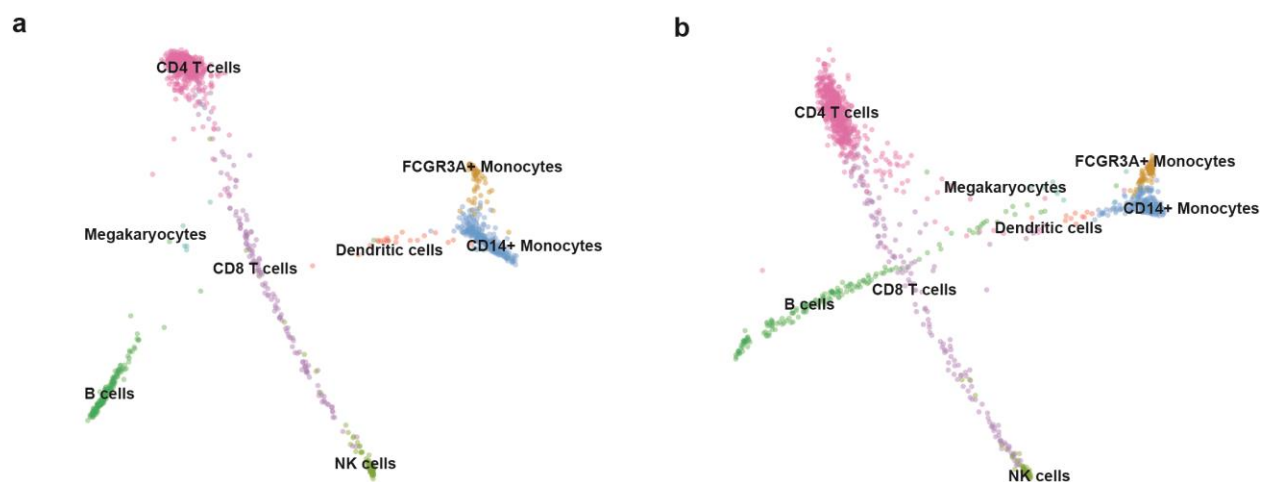

**Figure S5:** A 3,000 cell dataset of PBMCs was split in half to create training and test datasets.

**(a)** SWNE plot of the training dataset only. **(b)** SWNE plot of the test dataset only, projected onto the training embedding.



## References

1. Lake, B. *et al.* Neuronal subtypes and diversity revealed by single-nucleus RNA sequencing of the human brain. *Science (80-. )*. **357**, 352–357 (2016).
2. Blue B. Lake1†, Song Chen1†, Brandon C. Sos1, 4†, Jean Fan2†, Yun Yung3, Gwendolyn E. Kaeser3, 4, Thu E. Duong1, 5, Derek Gao1, Jerold Chun3\*, Peter Kharchenko2\*, K. Z. Integrative single-cell analysis by transcriptional and epigenetic states in human adult brain. *Nat. Publ. Gr.* 1–3 (2017). doi:10.1101/128520
3. Tirosh, I. *et al.* Dissecting the multicellular ecosystem of metastatic melanoma by single-cell RNA-seq. *Science (80-. )*. **352**, 189–196 (2016).
4. Puram, S. V *et al.* Single-Cell Transcriptomic Analysis of Primary and Metastatic Tumor Ecosystems in Head and Neck Cancer Single-cell transcriptomic analysis in patients with head and neck squamous cell carcinoma highlights the heterogeneous composition of malignant and non. *Cell* **172**, 1–14 (2017).
5. Trapnell, C. *et al.* The dynamics and regulators of cell fate decisions are revealed by pseudotemporal ordering of single cells. *Nat. Biotechnol.* **32**, 381–6 (2014).
6. Qiu, X. *et al.* Reversed graph embedding resolves complex single-cell trajectories. *Nat. Methods* **14**, 979–982 (2017).
7. Setty, M. *et al.* Wishbone identifies bifurcating developmental trajectories from single-cell data. *Nat. Biotechnol.* **34**, 1–14 (2016).
8. Macosko, E. Z. *et al.* Highly Parallel Genome-wide Expression Profiling of Individual Cells Using Nanoliter Droplets. *Cell* **161**, 1202–1214 (2015).
9. Klein, A. M. *et al.* Droplet Barcoding for Single-Cell Transcriptomics Applied to Embryonic Stem Cells. *Cell* **161**, 1187–1201 (2015).
10. Cao, J. *et al.* Comprehensive single cell transcriptional profiling of a multicellular organism by combinatorial indexing. *Science (80-. )*. **667**, 1–35 (2017).
11. Rosenberg, A. B. *et al.* Scaling single cell transcriptomics through split pool barcoding.

- Bioarxiv* (2017). doi:10.1101/105163
12. Buettner, F., Pratanwanich, N., McCarthy, D. J., Marioni, J. C. & Stegle, O. f-scLVM: scalable and versatile factor analysis for single-cell RNA-seq. *Genome Biol.* **18**, 212 (2017).
  13. Wang, B., Zhu, J., Pierson, E., Ramazzotti, D. & Batzoglou, S. Visualization and analysis of single-cell RNA-seq data by kernel-based similarity learning. *Nat. Methods* 1–6 (2017). doi:10.1038/nmeth.4207
  14. Maaten, L. Van Der & Hinton, G. Visualizing Data using t-SNE. *J. Mach. Learn. Res.* **9**, 2579–2605 (2008).
  15. van der Maaten, L. Accelerating t-sne using tree-based algorithms. *J. Mach. Learn. Res.* **15**, 3221–3245 (2014).
  16. Abdi, H. & Williams, L. J. Principal component analysis. *Chemom. Intell. Lab. Syst.* **2**, 433–459 (2010).
  17. Kruskal, J. B. Multidimensional scaling by optimizing goodness of fit to a nonmetric hypothesis. *Psychometrika* **29**, 1–27 (1964).
  18. McInnes, L. & Healy, J. UMAP: Uniform Manifold Approximation and Projection for Dimension Reduction. *arXiv* 1–18 (2018). at <<http://arxiv.org/abs/1802.03426>>
  19. Kim, J. W. *et al.* Decomposing Oncogenic Transcriptional Signatures to Generate Maps of Divergent Cellular States. *Cell Syst.* **5**, 105–118.e9 (2017).
  20. Lee, D. D. & Seung, H. S. Learning the parts of objects by non-negative matrix factorization. *Nature* **401**, 788–791 (1999).
  21. Franc, V., Hlaváč, V. & Navara, M. Sequential coordinate-wise algorithm for the non-negative least squares problem. *Lect. Notes Comput. Sci. (including Subser. Lect. Notes Artif. Intell. Lect. Notes Bioinformatics)* **3691 LNCS**, 407–414 (2005).
  22. Sammon, J. W. A Nonlinear Mapping for Data Structure Analysis. *IEEE Trans. Comput.* **C-18**, 401–409 (1969).

23. Houle, M. E., Kriegel, H. P., Kröger, P., Schubert, E. & Zimek, A. Can shared-neighbor distances defeat the curse of dimensionality? *Lect. Notes Comput. Sci. (including Subser. Lect. Notes Artif. Intell. Lect. Notes Bioinformatics)* **6187 LNCS**, 482–500 (2010).
24. Zappia, L., Phipson, B. & Oshlack, A. Splatter: simulation of single-cell RNA sequencing data. *Genome Biol.* **18**, 174 (2017).
25. Paul, F. *et al.* Transcriptional Heterogeneity and Lineage Commitment in Myeloid Progenitors. *Cell* **163**, 1663–1677 (2015).
26. Satija, R., Butler, A. & Hoffman, P. Seurat: Tools for Single Cell Genomics. (2018). at <<https://cran.r-project.org/package=Seurat>>
27. Molyneaux, B. J., Arlotta, P., Menezes, J. R. L. & Macklis, J. D. Neuronal subtype specification in the cerebral cortex. *Nat. Rev. Neurosci.* **8**, 427–437 (2007).
28. Bernard, A. *et al.* Transcriptional Architecture of the Primate Neocortex. *Neuron* **73**, 1083–1099 (2012).
29. Hubel, D. H. *Eye, brain, and vision. Eye, brain, and vision.* (Scientific American Library/Scientific American Books, 1995).
30. Seigneur, E. & Sudhof, T. C. Cerebellins Are Differentially Expressed in Selective Subsets of Neurons Throughout the Brain. *J Comp Neurol* **525**, 3286–3311 (2017).
31. Sander, T. Allelic association of juvenile absence epilepsy with a GluR5 kainate receptor gene (GRIK1) polymorphism. *Am. J. Med. Genet. - Neuropsychiatr. Genet.* **74**, 416–421 (1997).
32. Bunge, R. P. Glial cells and the central myelin sheath. *Physiol. Rev.* **48**, 197 LP-251 (1968).
33. Trotter, J. *et al.* Dab1 Is Required for Synaptic Plasticity and Associative Learning. *J. Neurosci.* **33**, 15652–15668 (2013).
34. Lin, J. C., Ho, W. H., Gurney, A. & Rosenthal, A. The netrin-G1 ligand NGL-1 promotes the outgrowth of thalamocortical axons. *Nat. Neurosci.* **6**, 1270–1276 (2003).

35. Lin, X. & Paul C Boutros. NNLM: Fast and Versatile Non-Negative Matrix Factorization. (2016). at <<https://cran.r-project.org/package=NNLM>>
36. Zheng, G. X. Y. *et al.* Massively parallel digital transcriptional profiling of single cells. *Nat. Commun.* **8**, 1–12 (2017).
37. Fan, J. *et al.* Characterizing transcriptional heterogeneity through pathway and gene set overdispersion analysis. *Nat. Methods* **13**, 241–244 (2016).
38. Barkas, N. *et al.* pagoda2: A package for analyzing and interactively exploring large single-cell RNA-seq datasets. (2018). at <<https://github.com/hms-dbmi/pagoda2>>
39. Kim, J. W. *et al.* Characterizing genomic alterations in cancer by complementary functional associations. *Nat. Biotechnol.* **34**, 3–5 (2016).
40. Subramanian, A. *et al.* Gene set enrichment analysis: a knowledge-based approach for interpreting genome-wide expression profiles. *Proc. Natl. Acad. Sci. U. S. A.* **102**, 15545–50 (2005).
